# Supplementary material for: Influence of PapMV nanoparticles on the kinetics of the antibody response to flu vaccine
Source: PubMed Central journal article supplement (PMC4901503; doi:10.1186/s12951-016-0200-2), 2016-06-10

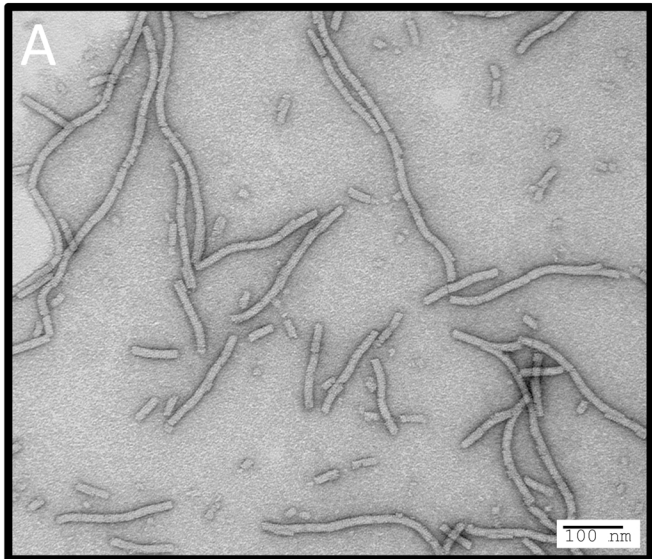

**B** 4 measurements:

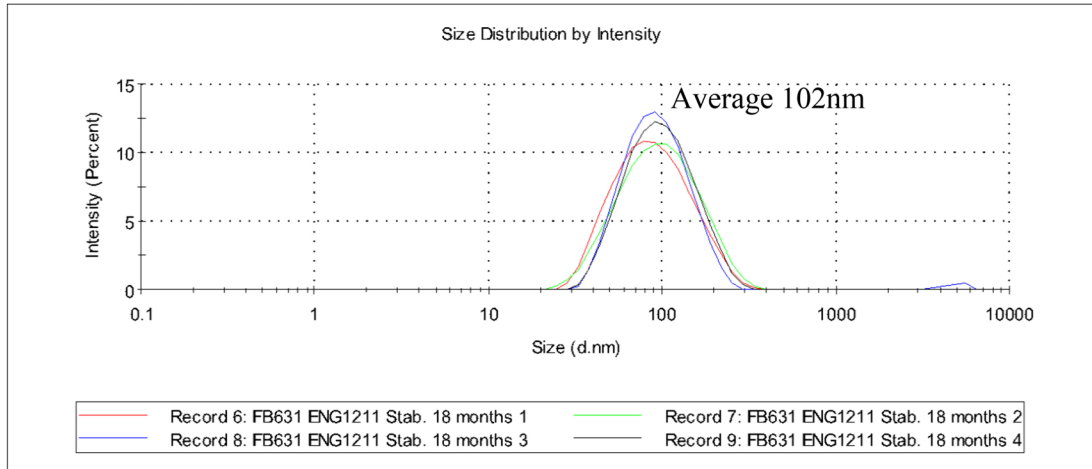

Supplement: 12951_2016_200_MOESM5_ESM.pdf [file 12951_2016_200_MOESM5_ESM.pdf]
